# Supplementary figures and images for: Effects of dietary extra virgin olive oil and its fractions on antioxidant status and DNA damage in the heart of rats co-exposed to aluminum and acrylamide
Source: Royal Society of Chemistry journal article supplement (doi:10.1039/c5fo00342c), 2015-01-01

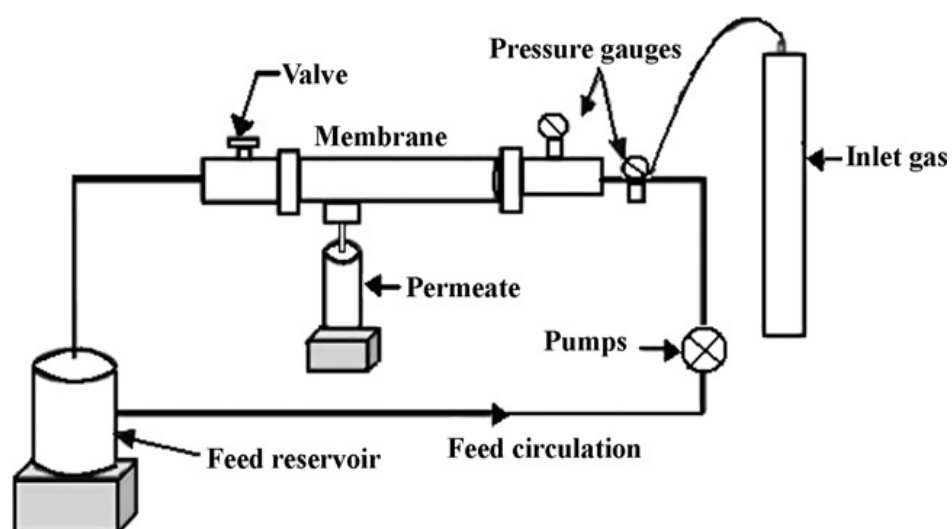

Scheme of the pilot plant.

Supplement: c5fo00342c1.pdf [file c5fo00342c1.pdf]
